# Supplementary material for: Eu8(NCN)5–δI6+2δ(δ= 0.05): a novel rare-earth carbodiimide iodide containing oligomeric tritetrahedral Eu8 clusters
Source: Royal Society of Chemistry journal article supplement (doi:10.1039/b504235f), 2005-01-01
Supplement: b504235f.pdf [file b504235f.pdf]

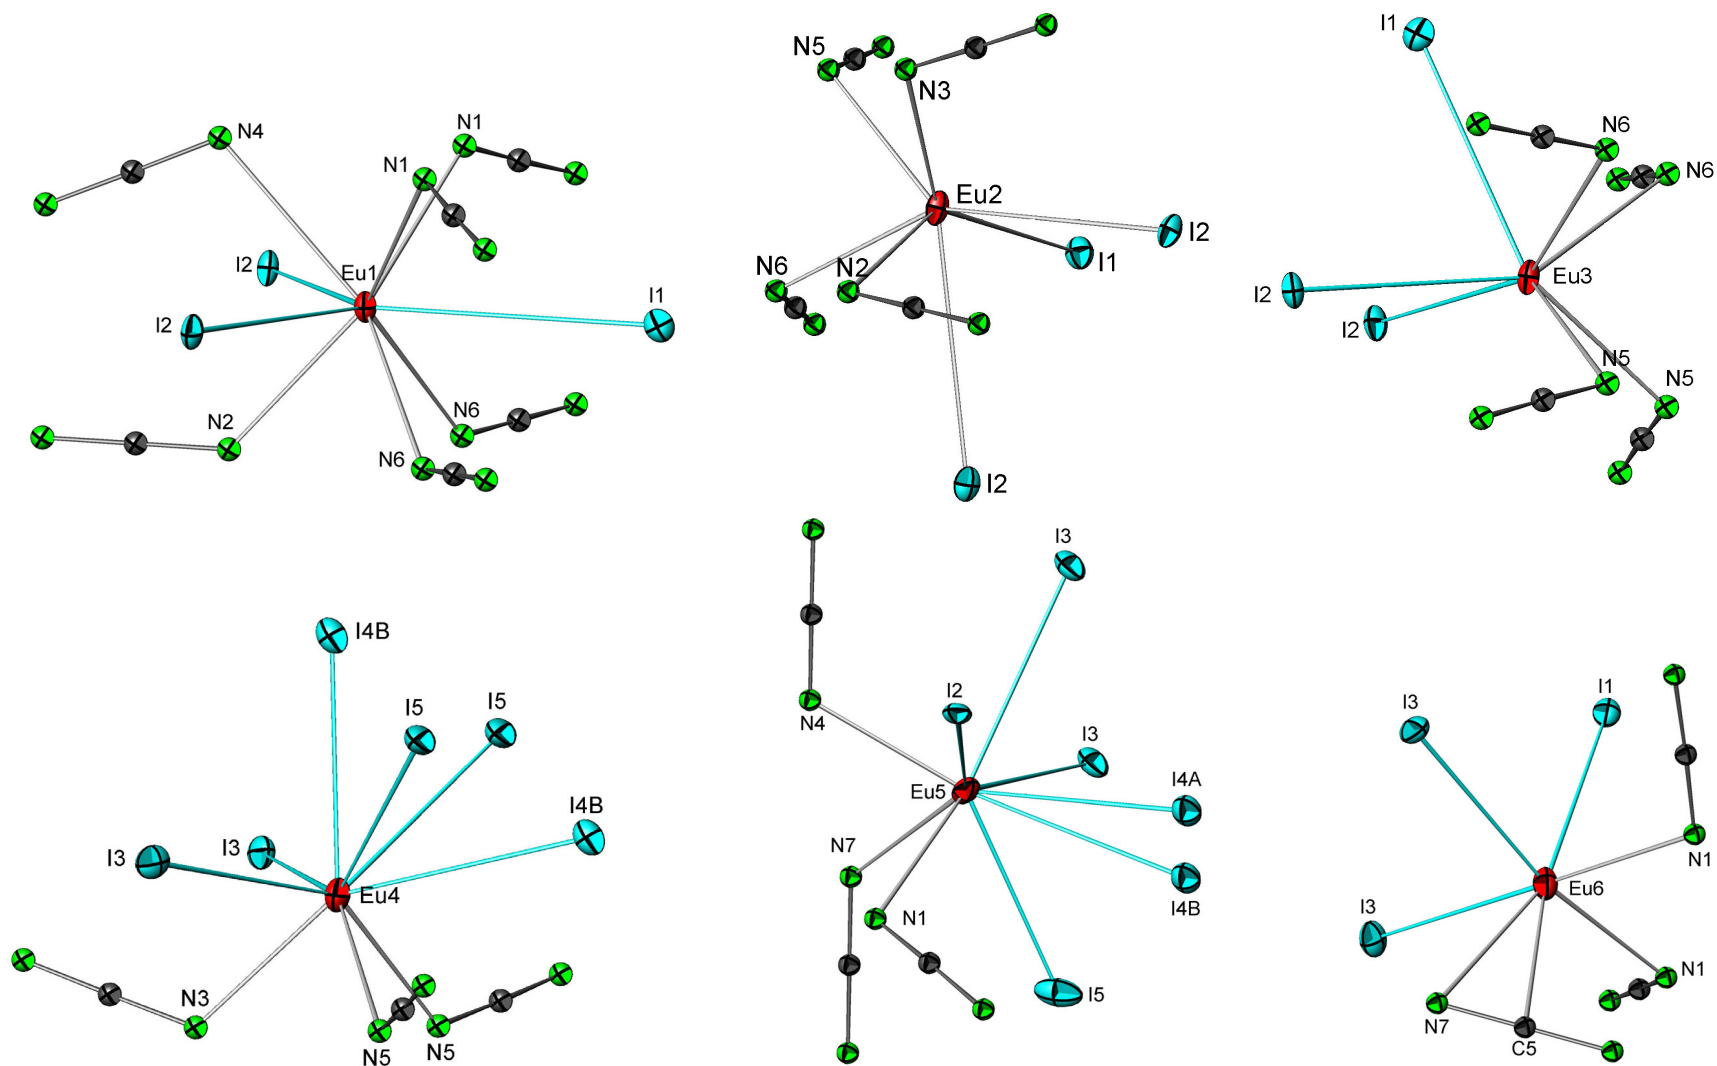

Supplementary Information: Coordinations of the six different Eu sites in  $\text{Eu}_8(\text{NCN})_{4.95}\text{I}_{6.10}$ .
